# Supplementary material for: Nanoparticulated Bimodal Contrast Agent for Ultra-High-Field Magnetic Resonance Imaging and Spectral X-ray Computed Tomography
Source: PubMed Central journal article supplement (PMC11167642; doi:10.1021/acs.inorgchem.4c01114), 2024-05-29
Supplement: ic4c01114_si_001.pdf [file ic4c01114_si_001.pdf]

## **Electronic Supplementary Information**

### **Nanoparticulated Bimodal Contrast Agent for Ultra-High-Field Magnetic Resonance Imaging and Spectral X-ray Computed Tomography**

Daniel González-Mancebo,<sup>1</sup> Ana Isabel Becerro,<sup>1\*</sup> Carlos Caro,<sup>2,3,4</sup> Elisabet Gómez-González,<sup>1</sup> María Luisa García-Martín,<sup>2,3,4</sup> Manuel Ocaña<sup>1</sup>

<sup>1</sup>Instituto de Ciencia de Materiales de Sevilla (CSIC-US), c/Américo Vespucio, 49, 41092 Seville, Spain.

<sup>2</sup>Biomedical Magnetic Resonance Laboratory-BMRL, Andalusian Public Foundation Progress and Health-FPS, 41092 Seville, Spain

<sup>3</sup>Instituto de Investigación Biomédica de Málaga y Plataforma en Nanomedicina – IBIMA Plataforma BIONAND Málaga 29590, Spain

<sup>4</sup>CIBER-BBN, ISCIII

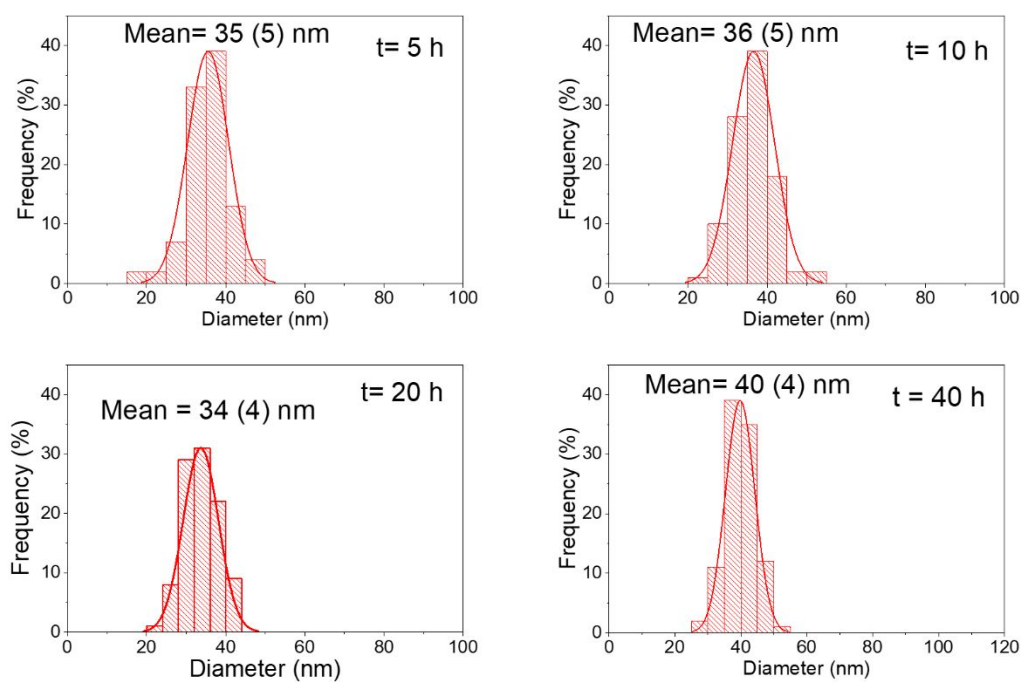

**Figure S1:** Size histograms obtained from TEM micrographs of the NPs synthesized at different reaction times using nominal  $Ba/(Ba+Dy) = 0.75$ .

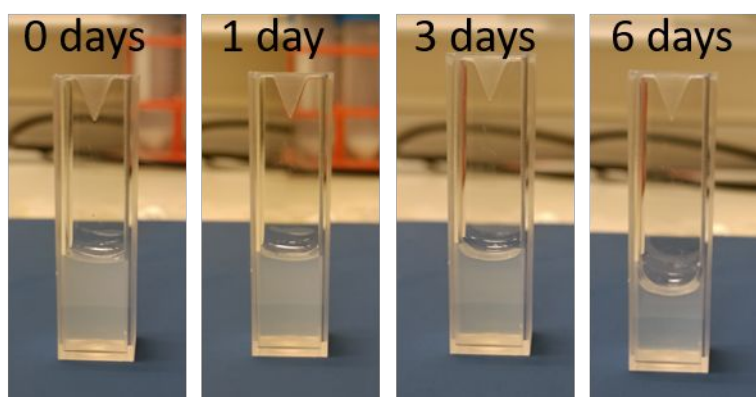

**Figure S2:** Photographs of Ba<sub>51</sub>Dy<sub>49</sub> NPs suspensions taken after different periods of time at rest.

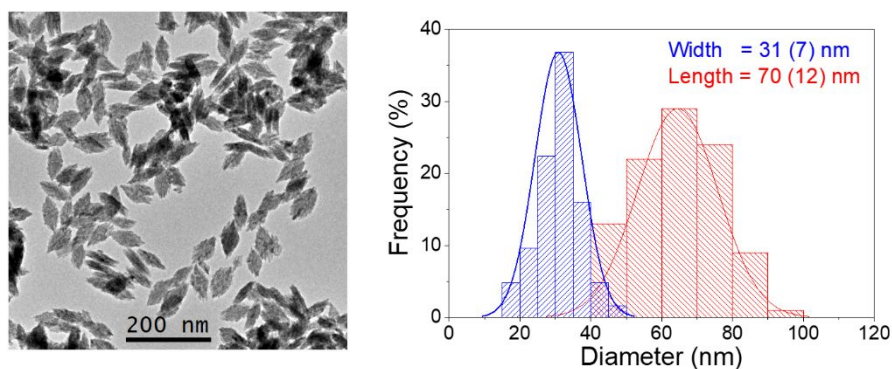

**Figure S3:** TEM micrograph and size histograms of  $\text{DyF}_3$  NPs synthesised as follows:  $\text{Dy}(\text{acac})_3$  (0.067 M) was dispersed in glycerol (6 mL) with magnetic stirring at 80 °C for 3 hours. After cooling down, 205.5  $\mu\text{L}$  of  $[\text{BMIM}]\text{BF}_4$  (0.55 M) were added with magnetic stirring for 3 minutes at room temperature to favor homogenization. The resulting dispersion was transferred to a tightly closed Teflon test tube and heated for 20 hours in an oven preheated at 120 °C. After cooling down, the dispersion was washed twice with ethanol and once with distilled water.
